# Supplementary material for: Identification and Validation of the Genomic Regions for Waterlogging Tolerance at Germination Stage in Wheat
Source: MDPI journal article supplement (doi:10.3390/agronomy12081848), 2022-08-04
Supplement: s1 [file s1]

Supplementary Table S1. The varieties highly resistant to waterlogging stress.

| Accession       | Germination rate (%) |       |         |
|-----------------|----------------------|-------|---------|
|                 | Rep1                 | Rep2  | Average |
| Shannong 135    | 88.0                 | 92.0  | 90.0    |
| SN II-12        | 84.0                 | 88.0  | 86.0    |
| Shannong 397    | 84.0                 | 100.0 | 92.0    |
| Lumai 17        | 88.0                 | 96.0  | 92.0    |
| Shannong 420    | 88.0                 | 84.0  | 86.0    |
| Yan 278         | 96.0                 | 92.0  | 94.0    |
| Hemai no.3      | 96.0                 | 88.0  | 92.0    |
| Luyuan 646      | 88.0                 | 96.0  | 92.0    |
| Lumai 11        | 100.0                | 88.0  | 94.0    |
| Shannong 919    | 88.0                 | 92.0  | 90.0    |
| Yan 180         | 92.0                 | 96.0  | 94.0    |
| Zimai no.2      | 92.0                 | 92.0  | 92.0    |
| Shannong 112281 | 88.0                 | 88.0  | 88.0    |
| Yan 672         | 96.0                 | 88.0  | 92.0    |
| Zhoumai 27      | 96.0                 | 84.0  | 90.0    |
| Jia 0316        | 88.0                 | 96.0  | 92.0    |
| Xin 0208        | 100.0                | 92.0  | 96.0    |
| Shannong 650896 | 84.0                 | 100.0 | 92.0    |
| Shannong 566    | 88.0                 | 84.0  | 86.0    |
| Shannong 60205  | 92.0                 | 96.0  | 94.0    |
| SN III-11       | 88.0                 | 96.0  | 92.0    |
| Huaimai 18      | 88.0                 | 92.0  | 90.0    |
| Shixin 828      | 84.0                 | 92.0  | 88.0    |
| Shannong 113211 | 84.0                 | 84.0  | 84.0    |
| Shaan 943       | 84.0                 | 96.0  | 90.0    |
| Gaocheng 8901   | 84.0                 | 96.0  | 90.0    |
| Xu 5123         | 92.0                 | 88.0  | 90.0    |
